# Supplementary material for: Two-dimensional, few-layer NiPS3 for flexible humidity sensor with high selectivity
Source: Royal Society of Chemistry journal article supplement (doi:10.1039/c9ta03214b), 2019-01-01
Supplement: c9ta03214b1.pdf [file c9ta03214b1.pdf]

## Supporting Information

### Two-dimensional NiPS<sub>3</sub> for flexible humidity sensors with high selectivity

*Ramesh Naidu Jenjeti, Rajat Kumar and S Sampath\**

Department of Inorganic and Physical Chemistry

Indian Institute of Science

Bangalore 560012, India

E-mail: [sampath@iisc.ac.in](mailto:sampath@iisc.ac.in)

| Contents                                                                                          | Page   |
|---------------------------------------------------------------------------------------------------|--------|
| 1. Schematic diagram of the humidity sensor setup                                                 | S2     |
| 2. Structural representation of MoS <sub>2</sub> , graphene and their SEM images                  | S3     |
| 3. BET adsorption – desorption isotherms of bulk and few-layer NiPS <sub>3</sub>                  | S4     |
| 4. Atomic force microscopic (AFM) image of single layer NiPS <sub>3</sub>                         | S5     |
| 5. I-V profiles of NiPS <sub>3</sub> obtained at different relative humidity (RH) levels          | S5     |
| 6. Atomic force microscopic images of thin film NiPS <sub>3</sub> , MoS <sub>2</sub> and Graphene | S6     |
| 7. Response vs recovery time at constant humidity                                                 | S7     |
| 8. Stability of few-layer NiPS <sub>3</sub> humidity sensor over storage time                     | S8     |
| 9. Thickness dependent humidity sensing performance of restacked few-layer NiPS <sub>3</sub>      | S9     |
| 10. Humidity Sensing behavior of bulk NiPS <sub>3</sub> device                                    | S10    |
| 11. Cycling stability performance of bulk NiPS <sub>3</sub>                                       | S11    |
| 12. Current response of the flexible device to RH of the breath exhaled from nasal cavity         | S12    |
| 13. Response vs recovery at constant humidity with glove wearing hand                             | S13    |
| 14. Water contact angle data on NiPS <sub>3</sub> film                                            | S14    |
| 15. Comparison of the present data with the literature reports                                    | S15-16 |

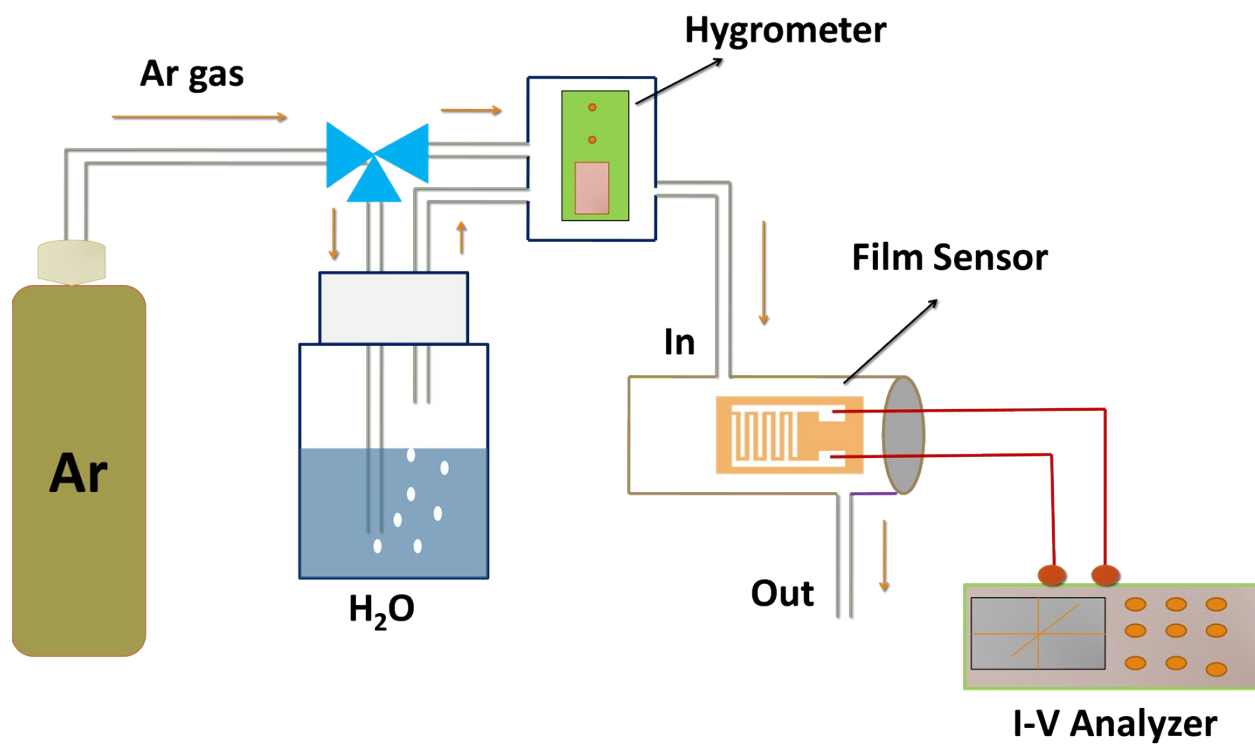

**Figure S1.** Schematic diagram of humidity sensor setup.

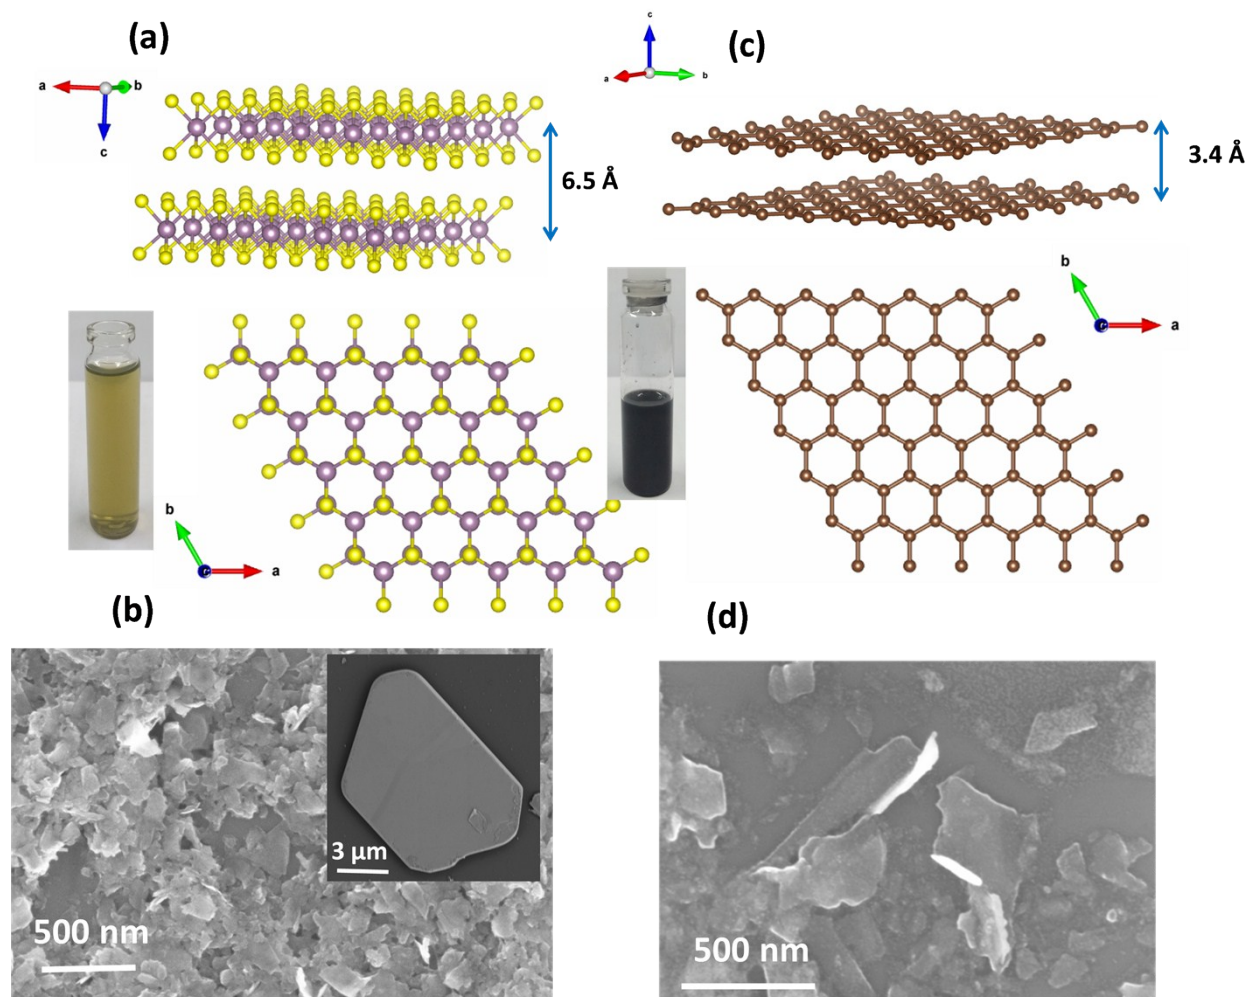

**Figure S2.** Structural representation of (a) MoS<sub>2</sub> along with the (b) scanning electron microscopic (SEM) images of bulk and few-layer MoS<sub>2</sub> and (c) graphene along with the (d) SEM image.

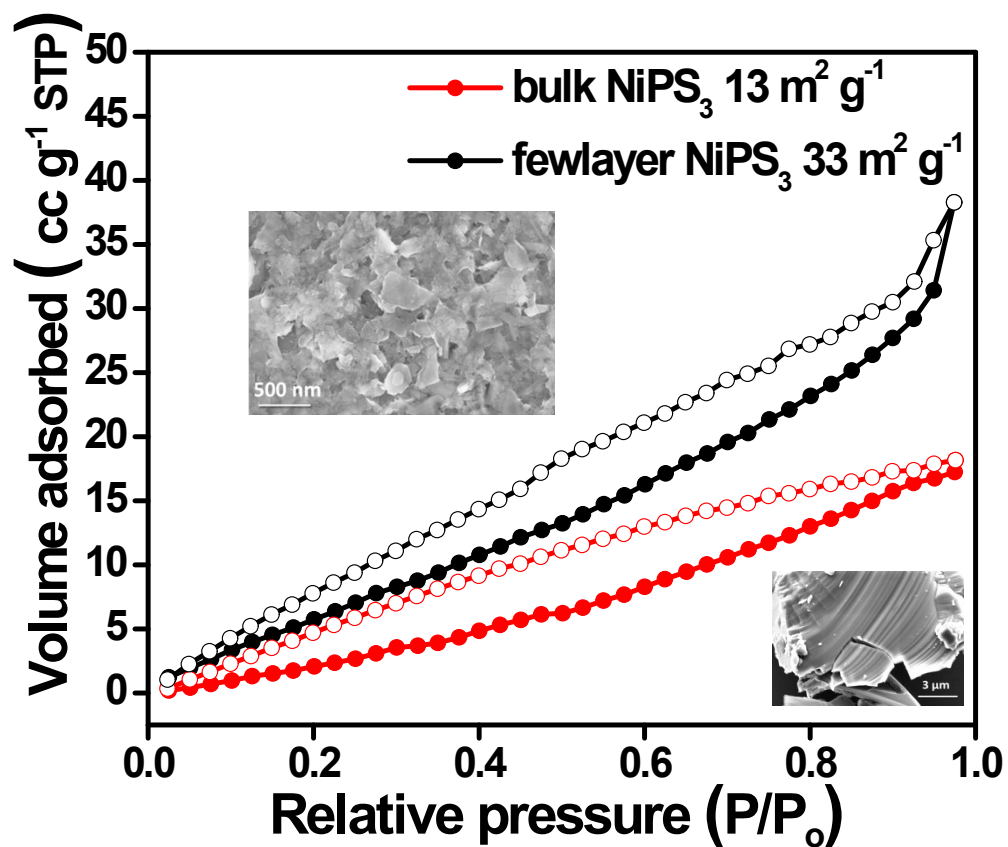

**Figure S3.** BET adsorption – desorption isotherms of bulk and few-layer  $\text{NiPS}_3$ . BET measurements are carried out in  $\text{N}_2$  atmosphere and at 77K temperature.

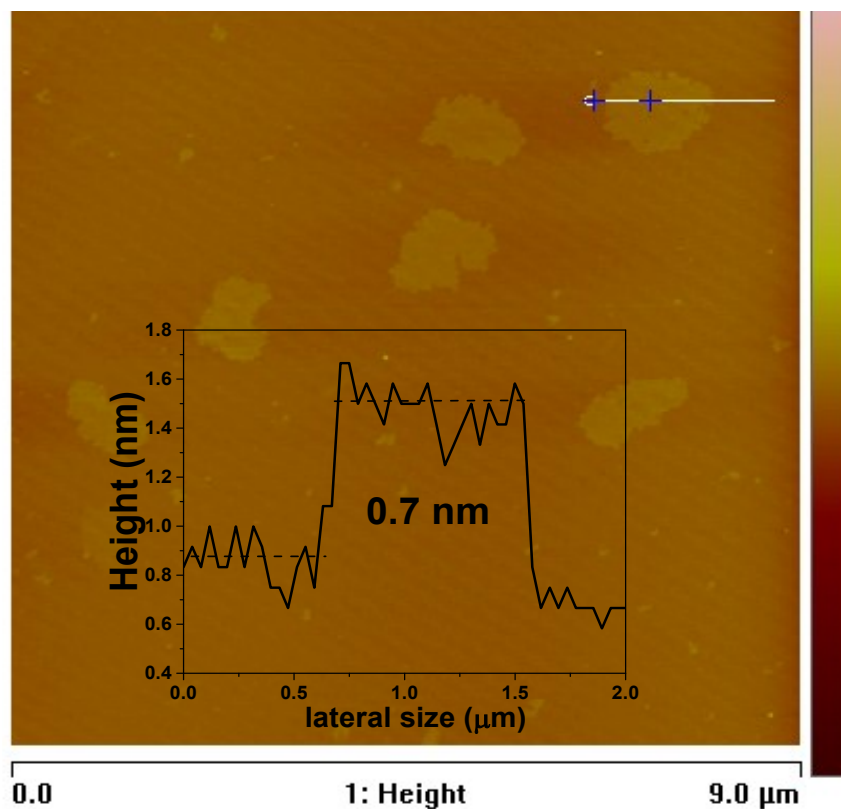

**Figure S4.** Atomic force microscopic (AFM) image of single layer  $\text{NiPS}_3$  and corresponding height profile (inset).

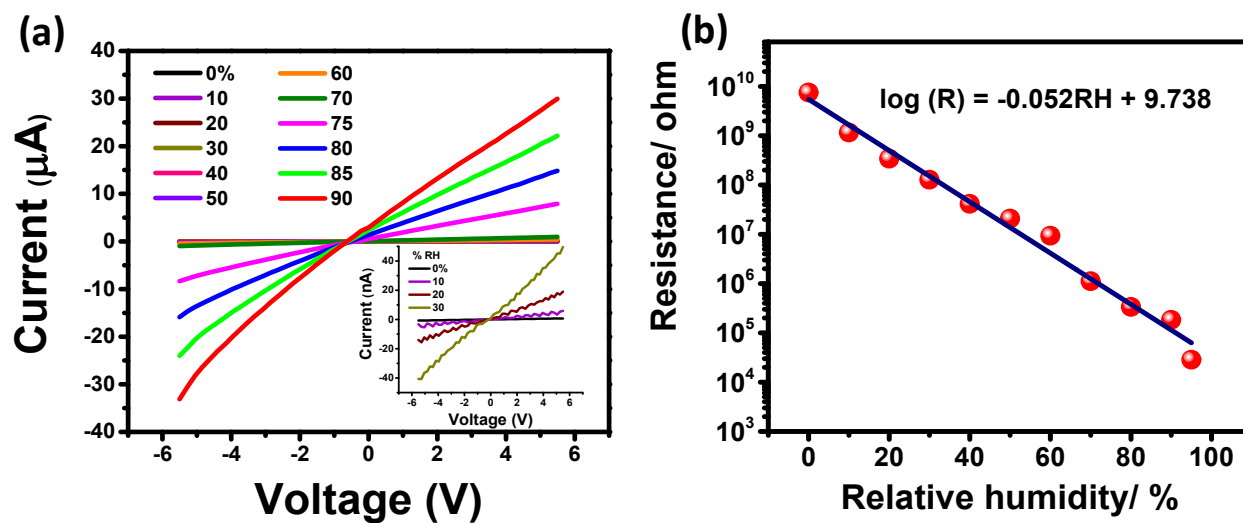

**Figure S5.** (a) I-V profiles of  $\text{NiPS}_3$  obtained at different relative humidity (RH) values. (b)  $\log(R)$  vs RH.

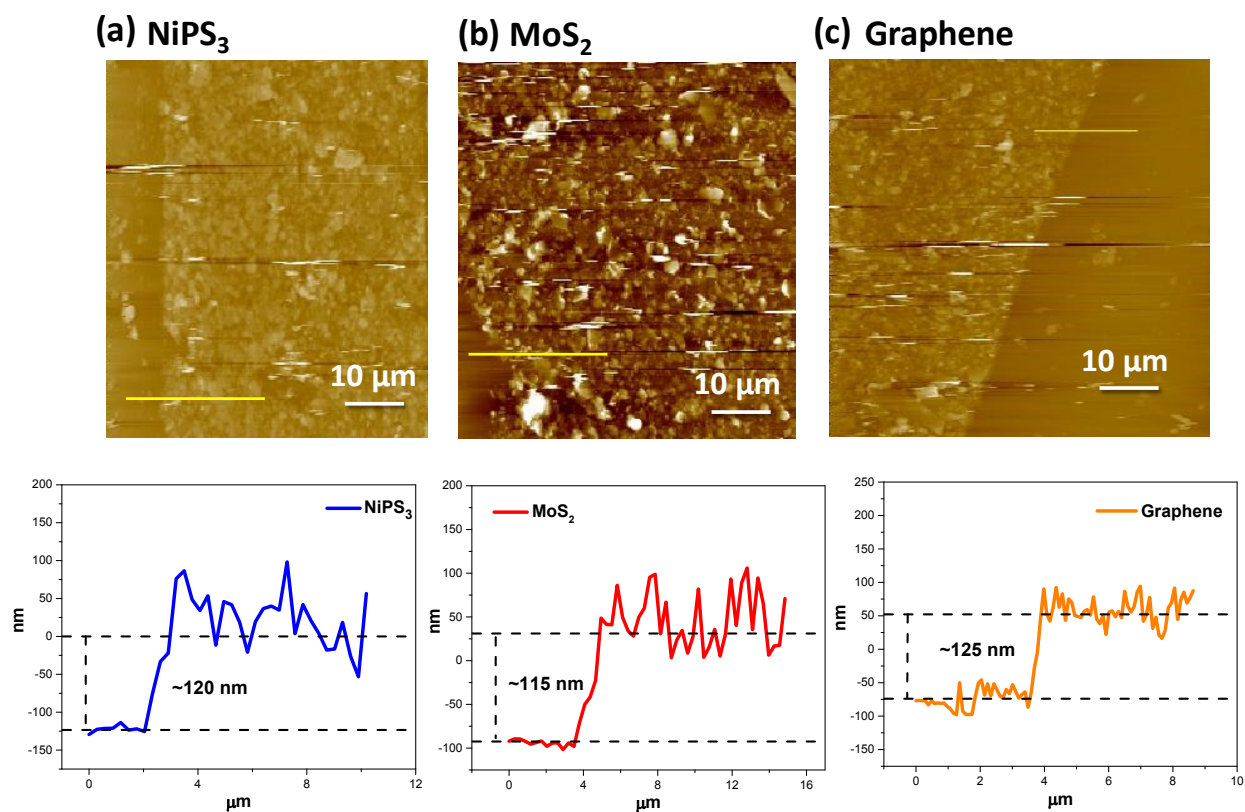

**Figure S6.** Atomic force microscopic images of thin films a)  $\text{NiPS}_3$ , b)  $\text{MoS}_2$  and c) Graphene along with corresponding height profiles.

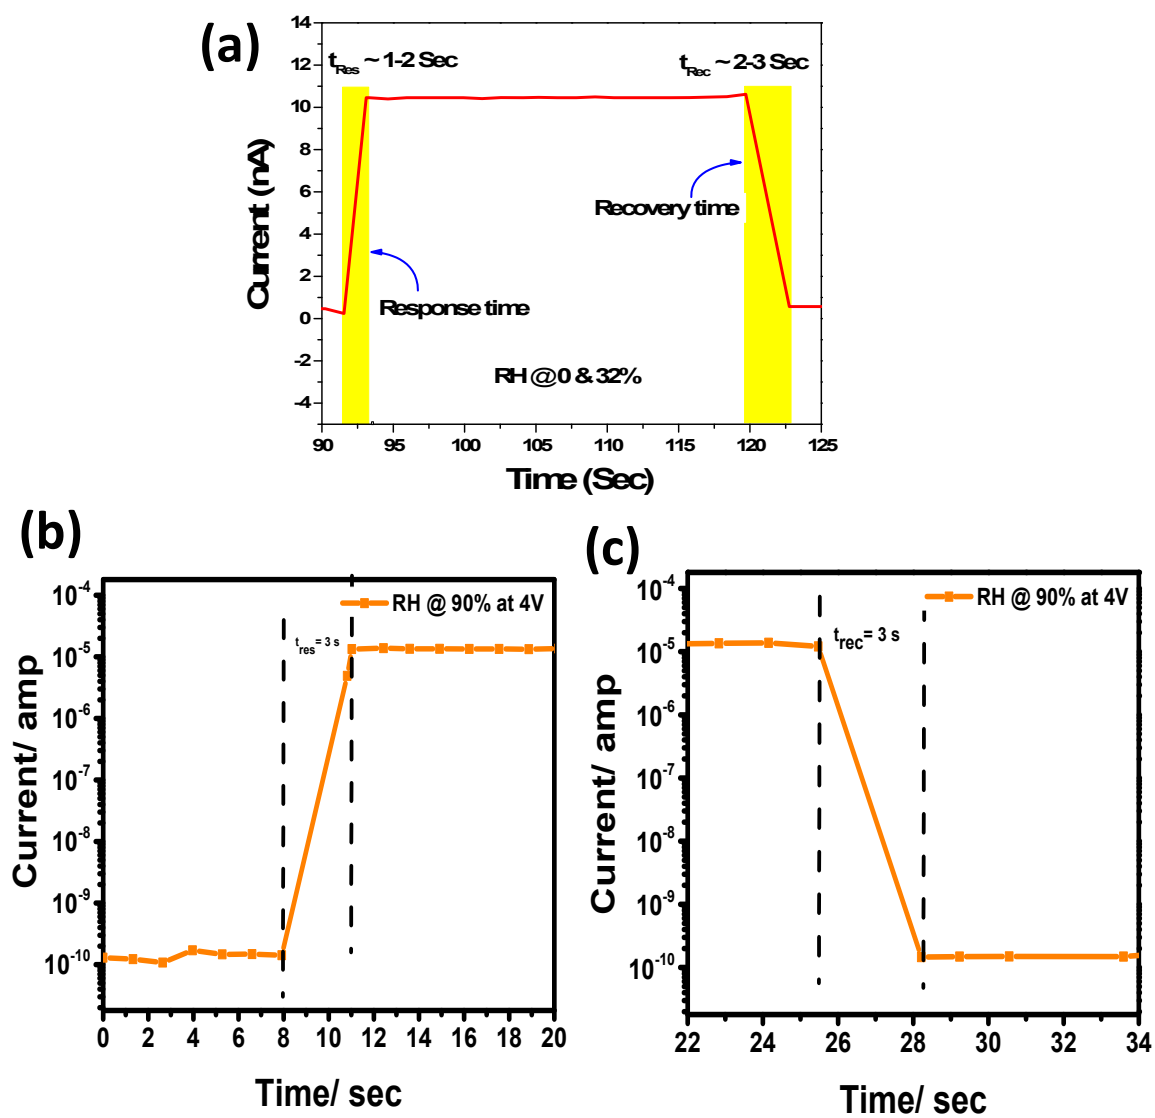

**Figure S7.** (a) Response vs recovery time at low humidity (RH of 0% to 32%); (b, c) denote high humidity response and recovery between RH of 0% to 90%.

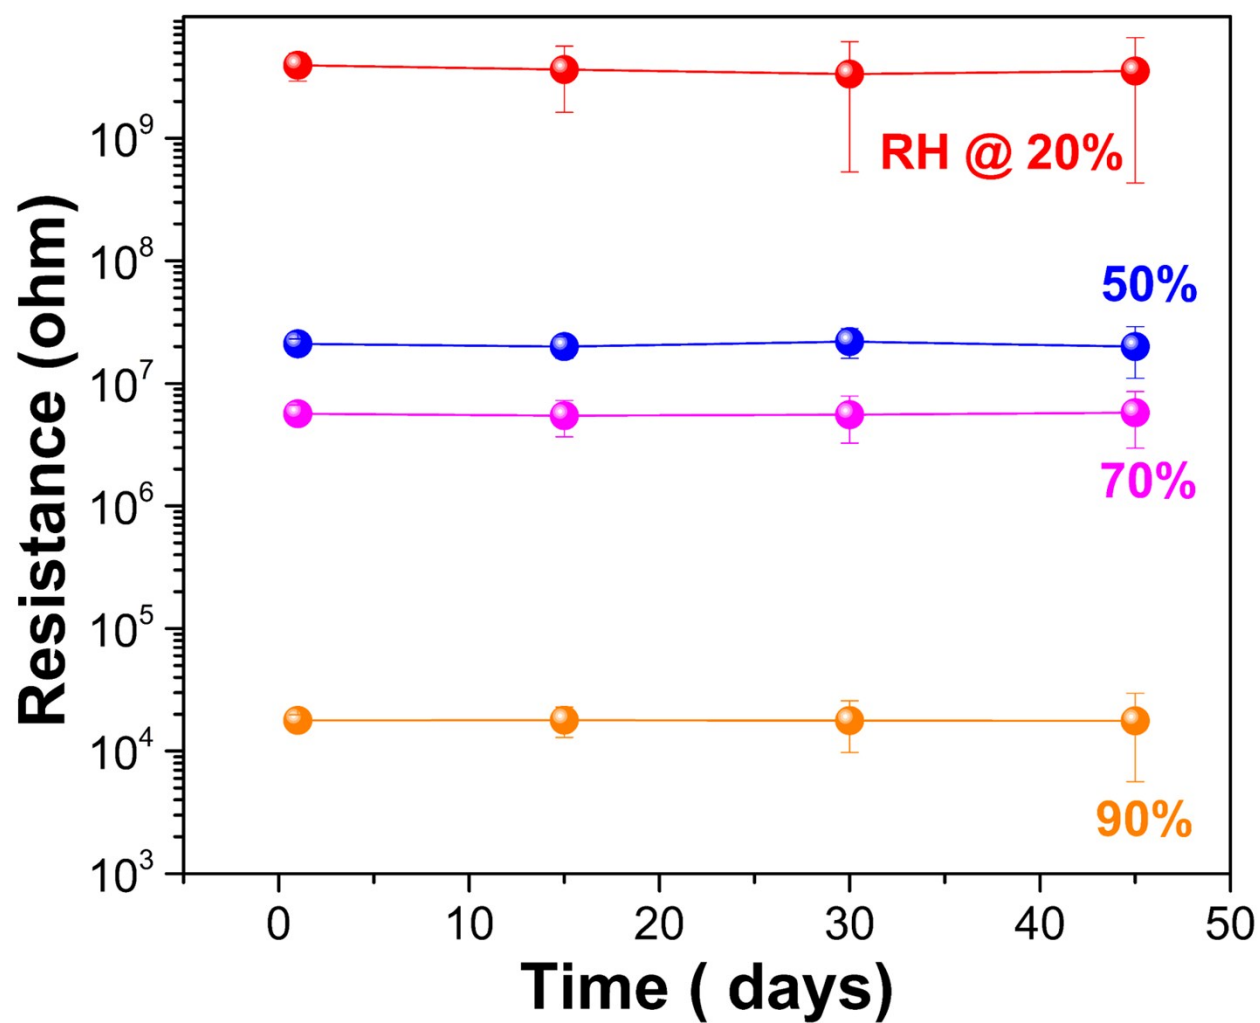

**Figure S8.** Stability of few-layer NiPS<sub>3</sub> humidity sensor over storage time for various humidity levels.

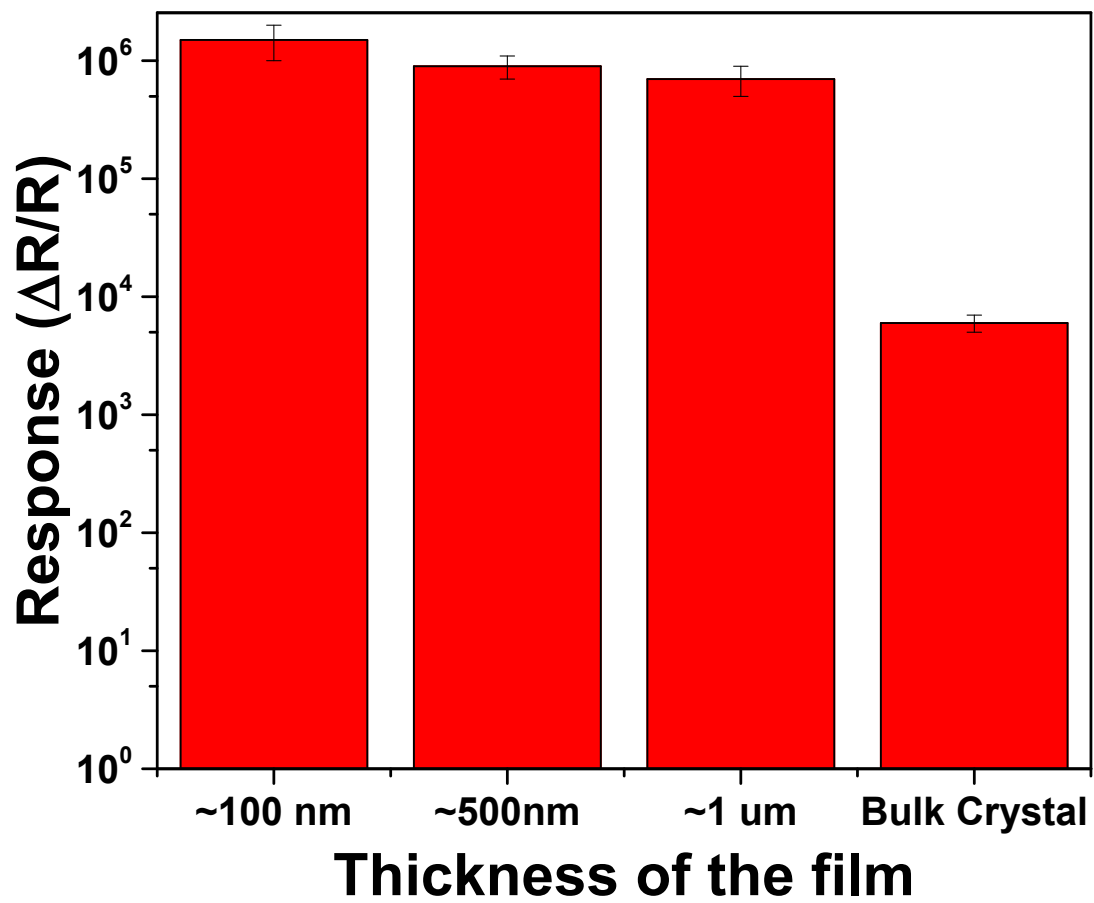

**Figure S9.** Thickness dependent humidity sensing performance of restacked few-layer NiPS<sub>3</sub> films of various thicknesses (~100nm, ~500nm and ~1000nm) and bulk crystal.

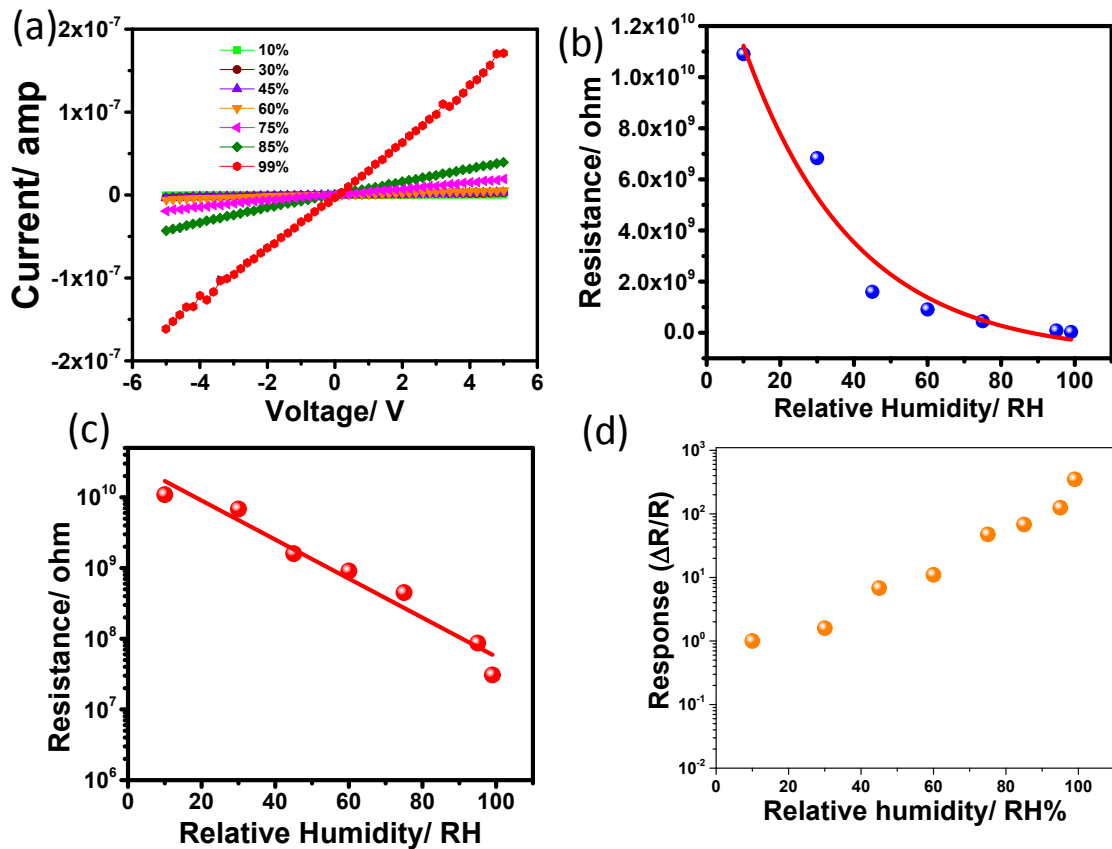

**Figure S10.** (a) I-V profiles obtained for the device based on bulk  $\text{NiPS}_3$  at different relative humidity (RH) values (b) Resistance (R) vs RH at different ranges of humidity; (c) Log(R) vs RH, (d) Responsivity ( $\Delta R/R$ ) vs. RH of bulk  $\text{NiPS}_3$ .

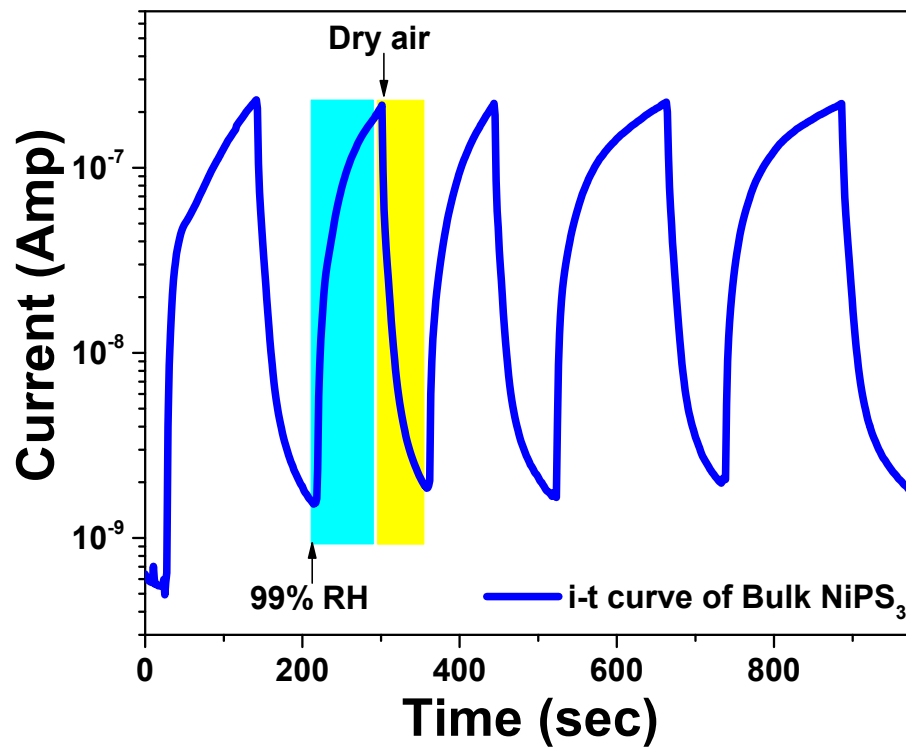

**Figure S11.** Response of bulk NiPS<sub>3</sub> based sensor between dry air and 99% RH.

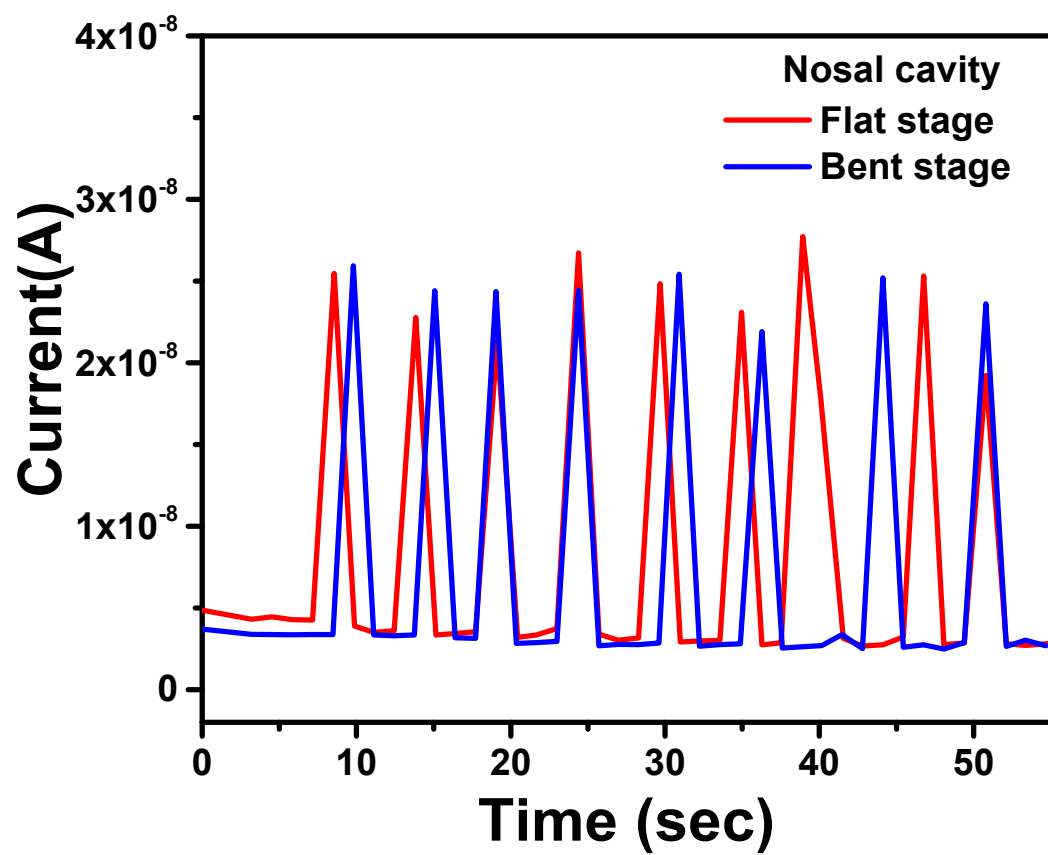

**Figure S12.** Current response to RH of the breath exhaled from the nasal cavity in both flat and bent configurations.

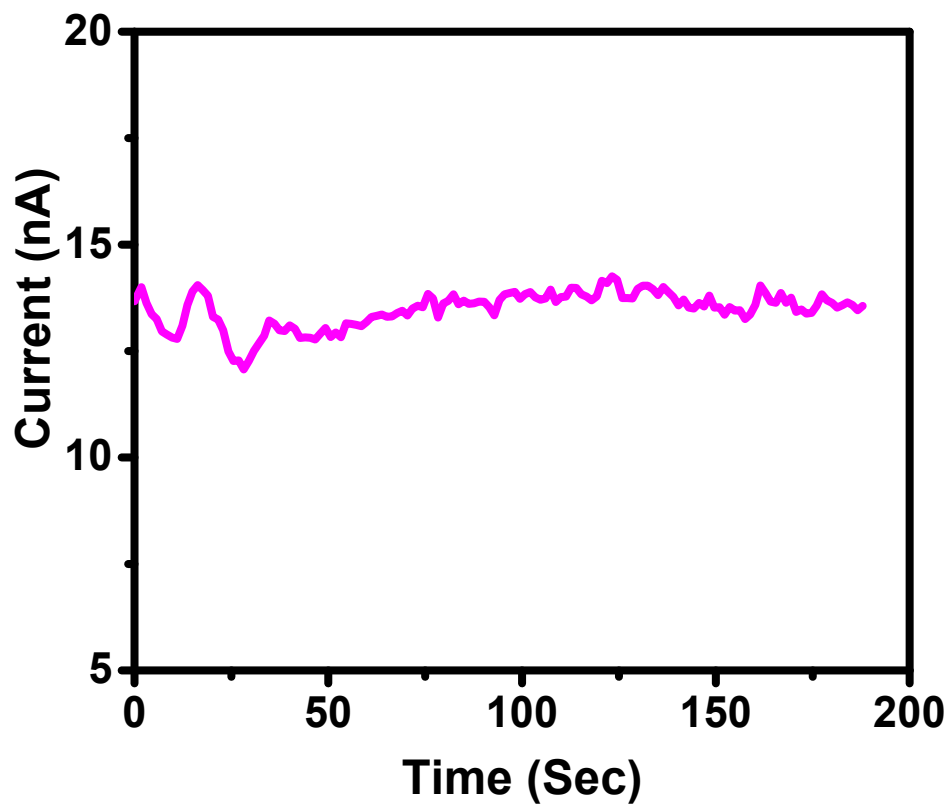

**Figure S13.** Response of the sensor for glove wearing hand. The base current is due the ambient humidity in the laboratory.

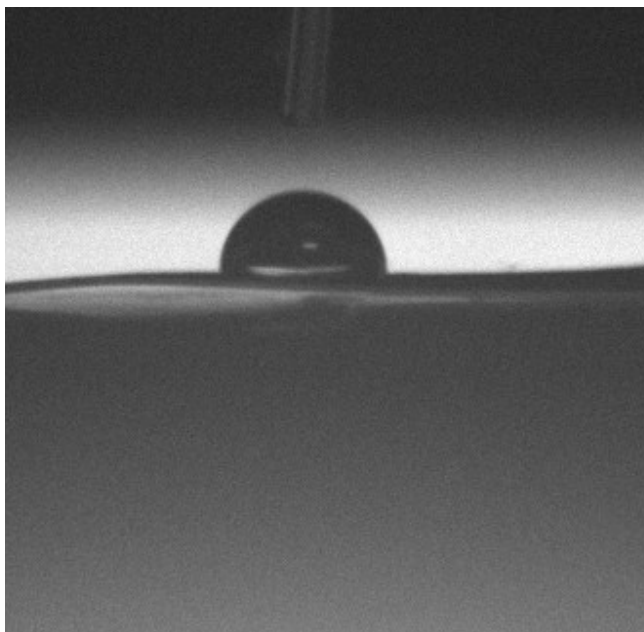

**Figure S14.** Water contact angle data on NiPS<sub>3</sub> film (80°).

**Table S1.** Comparison of humidity sensing performance obtained using NiPS<sub>3</sub> with other reported 2D materials.

| Material                           | Sensing technique | Response time (s) | Recovery time (s) | Response                     | Reference                                                      |
|------------------------------------|-------------------|-------------------|-------------------|------------------------------|----------------------------------------------------------------|
| VS <sub>2</sub>                    | Resistive         | 30-40             | 12-50             | 30 ( $\Delta R/R$ )          | <i>Adv. Mater.</i> <b>2012</b> , <i>24</i> , 1969.             |
| MoS <sub>2</sub>                   | Resistive         | 9                 | 17                | 150 ( $\Delta R/R$ )         | <i>Nanotech.</i> <b>2014</b> , <i>14</i> , 8518.               |
| MoS <sub>2</sub>                   | FET               | 10                | 60                | -                            | <i>Adv. Mater.</i> , <b>2017</b> , 1702076.                    |
| MoS <sub>2</sub> /GO               | Resistive         | 43                | 37                | ~900 ( $\Delta R/R$ )        | <i>RSC Adv.</i> <b>2016</b> , <i>6</i> , 57424.                |
| MoS <sub>2</sub> /SnO <sub>2</sub> | Capacitive        | 5                 | 13                | 3285000% ( $\Delta C/C$ )    | <i>ACS Appl. Mater. Inter.</i> <b>2016</b> , <i>8</i> , 14142. |
| WS <sub>2</sub>                    | Resistive         | 13                | 17                | 3750 ( $\Delta R/R$ )        | <i>Nanotech.</i> <b>2016</b> , <i>27</i> , 475503.             |
| WS <sub>2</sub>                    | Resistive         | 5                 | 6                 | 2357 ( $R_{20\%}/R_{90\%}$ ) | <i>Nanoscale</i> <b>2017</b> , <i>9</i> , 6246.                |
| WS <sub>2</sub> nanoparticle       | Resistive         | 12                | 13                | ~ 475 ( $\Delta R/R$ )       | <i>ACS Appl. Mater. Inter.</i> <b>2016</b> , <i>8</i> , 3359   |
| SnS <sub>2</sub>                   | Resistive         | 67                | 5                 | -                            | <i>RSC Adv.</i> <b>2016</b> , <i>6</i> , 105421.               |
| SnSe <sub>2</sub>                  | Resistive         | 74                | 30                | -                            | <i>Chem. Select</i> <b>2016</b> , <i>1</i> , 5380.             |
| GO                                 | Impedance         | 0.03              | 0.03              | -                            | <i>ACS Nano</i> <b>2013</b> , <i>7</i> , 11166-11173.          |
| GO                                 | Resistive         | ~5                | ~6                | 120000 ( $\Delta I/I$ )      | <i>IEEE Trans. on Nanotech.</i> <b>2015</b> , <i>14</i> , 931. |
| GO                                 | Capacitive        | 10.5              | 41                | 37757 ( $\Delta C/C$ )       | <i>Sci. Rep.</i> <b>2013</b> , <i>3</i> , 2714.                |
| GO                                 | Piezoelectric     | 19                | 10                | 79.3( $\Delta V/RH\%$ )      | <i>Sens. Act.,B</i> <b>2012</b> , <i>161</i> , 1053.           |

|                         |                  |             |             |                                                                 |                                                          |
|-------------------------|------------------|-------------|-------------|-----------------------------------------------------------------|----------------------------------------------------------|
| GO                      | Capacitive       | 2.7         | 4.6         | 4450544 ( $\Delta C/C$ )                                        | <i>Nanoscale</i> <b>2018</b> , 10, 5599.                 |
| GO/polyelectrolyte      | Capacitive       | -           | -           | 265640 ( $\Delta C/C$ )                                         | <i>Sens. Act., B</i> <b>2014</b> , 203, 263.             |
| Graphene                | Resistive        | 0.6         | 0.4         | 0.31( $\Delta R/R\%$ $\Delta RH$ )                              | <i>Nanoscale</i> , <b>2015</b> , 7, 19099–19109.         |
| rGO                     | Resistive        | 28          | 48          | 0.043 ( $\log Z/RH\%$ )                                         | <i>Sens. Act., B</i> <b>2014</b> , <b>200</b> , 9.       |
| BP                      | Resistive        | 255         | 10          | 99.17 ( $\Delta R/R$ )                                          | <i>Micropor. Mesopor. Mat.</i> , <b>2016</b> , 225, 494. |
| BP                      | Capacitive       | 4.7         | 3.0         | 507825 ( $\Delta C/C$ )                                         | <i>Nanoscale</i> <b>2018</b> , 10, 5599.                 |
| <b>NiPS<sub>3</sub></b> | <b>Resistive</b> | <b>~1-2</b> | <b>~2-3</b> | <b>1.5 X 10<sup>6</sup></b><br><b>(<math>\Delta R/R</math>)</b> | <b>Present study</b>                                     |
